# Supplementary material for: Lordosis distribution index in an asymptomatic elderly population: the role of lower and upper lumbar lordosis according to individual pelvic incidence and Roussouly type
Source: Research Square preprint supplement (doi:10.21203/rs.3.rs-6166524/v1), 2025-04-03
Supplement: Supplementary file 1 [file 63bf9648700f016672cd757e.xlsx]

## Sheet: Sheet1
ID	No.	Age	Height	Weight	BMI	PL_C7	PL_T12	PL_Lumbar	SS	PI	PT	TK	TLK	LL	LL_Upper	LL_Middle	LL_Lower	LDI	Roussouly PI<45, 45=<PI<60, PI=>60	K-Roussouly PI<44, 44=<PI<55, PI=>55
v036	193	53	168	67	24	8	-20	25	34	58	-24	39	6	-55	-4	-16	-35	63.6364	3	4
v046	203	55	168	70	25	-36	-23	20	29	44	-15	17	7	-45	3	-15	-33	73.3333	1
v113	266	55	164	53	20	9	-7	26	41	55	-14	36	-2	-63	-10	-13	-40	63.4921	3	4
v045	202	56	167	70	25	-31	-12	20	35	43	-8	14	-5	-48	-1	-12	-35	72.9167	2
v073	229	56	170	70	24	-5	-33	22	37	46	-9	43	12	-64	-15	-7	-42	65.625	3
v117	270	56	171	85	29	11	-19	23	38	52	-14	21	11	-51	3	-13	-41	80.3922	3
p012	10	57	171	75	26	-11	-32	24	43	49	-6	36	6	-62	0	-18	-44	70.9677	3
v013	173	57	158	65	26	9	-5	31	31	56	-25	20	8	-47	-1	-13	-33	70.2128	3	4
v017	177	57	173	75	25	-22	-6	32	46	52	-6	19	7	-65	-6	-23	-36	55.3846	3
v047	204	57	178	88	28	-11	-4	32	45	53	-8	8	2	-62	-5	-17	-40	64.5161	3
v049	206	57	169	60	21	37	-2	16	23	41	-18	15	8	-28	7	-12	-23	82.1429	1
v056	212	57	163	58	22	-19	6	36	37	47	-10	33	-5	-61	-13	-24	-24	39.3443	3
v063	219	57	168	63	22	-72	-34	22	35	42	-7	21	6	-55	-1	-19	-35	63.6364	2
v077	233	57	170	59	20	18	-29	23	28	45	-17	30	15	-44	6	-12	-38	86.3636	1
v135	285	57	171	76	26	-1	-2	28	38	52	-14	18	2	-54	-3	-5	-46	85.1852	3
v089	244	58	172	68	23	5	-28	28	40	56	-16	30	19	-60	3	-20	-43	71.6667	3	4
v097	251	58	178	86	27	-4	-22	23	32	44	-12	33	4	-51	-4	-11	-36	70.5882	2
v116	269	58	161	53	20	58	-1	31	44	46	-2	30	11	-58	0	-18	-40	68.9655	3
v123	276	58	178	85	27	14	-6	23	33	36	-3	30	7	-53	-5	-19	-29	54.717	2
v134	284	58	167	63	23	-25	-38	19	33	44	-11	31	13	-55	1	-14	-42	76.3636	1
v009	170	59	161	67	26	-10	-32	20	33	41	-8	37	13	-57	0	-25	-32	56.1404	2
v010	171	59	165	47	17	-31	-40	18	29	33	-4	29	16	-50	1	-8	-43	86	1
v015	175	59	173	68	23	-33	-16	25	36	44	-8	26	6	-58	-1	-17	-40	68.9655	2
v039	196	59	162	62	24	-16	-4	27	43	50	-7	28	6	-64	-9	-16	-39	60.9375	3
v059	215	59	170	89	31	22	-20	20	37	44	-7	35	15	-56	-1	-19	-36	64.2857	2
v062	218	59	165	50	18	17	-20	23	37	49	-12	23	16	-54	2	-16	-40	74.0741	3
v074	230	59	167	71	25	31	-16	29	42	56	-14	40	12	-66	-6	-22	-38	57.5758	3	4
v079	235	59	159	36	14	24	-13	23	40	49	-9	25	11	-53	4	-15	-42	79.2453	3
v086	241	59	167	63	23	-9	-1	35	41	53	-12	28	0	-62	-7	-22	-33	53.2258	3
v166	312	59	172	52	18	29	0	39	51	73	-22	33	6	-69	-6	-20	-43	62.3188	4	4
v175	321	59	165	65	24	17	-23	20	31	45	-14	23	14	-45	4	-13	-36	80	1
v012	172	60	170	74	26	-32	-24	29	30	43	-13	23	10	-54	-3	-21	-30	55.5556	2
v023	181	60	172	70	24	10	-5	30	30	51	-21	35	5	-63	-18	-9	-36	57.1429	3
v024	182	60	162	61	23	-11	-30	16	26	40	-14	26	13	-45	0	-13	-32	71.1111	2
v038	195	60	175	73	24	12	-20	20	35	42	-7	24	10	-47	2	-11	-38	80.8511	1
v040	197	60	161	63	24	-25	-19	24	43	50	-7	35	7	-70	-2	-26	-42	60	3
v041	198	60	164	78	29	-9	-17	28	40	57	-17	23	7	-60	-2	-15	-43	71.6667	3	4
v051	208	60	166	72	26	-44	-29	19	35	46	-11	24	3	-59	-3	-16	-40	67.7966	3
v069	225	60	175	75	24	-21	-44	23	40	50	-10	25	23	-59	9	-18	-50	84.7458	3
v072	228	60	163	73	27	-2	-10	27	36	37	-1	22	6	-47	2	-12	-37	78.7234	1
v102	256	60	167	65	23	-22	-17	26	41	48	-7	43	-2	-79	-24	-16	-39	49.3671	3
v139	288	60	170	82	28	8	-22	23	26	38	-12	27	13	-43	3	-19	-27	62.7907	1
v146	295	60	165	78	29	-23	-7	29	51	48	3	20	7	-67	1	-20	-48	71.6418	3A
v169	315	60	174	61	20	-16	-24	19	32	35	-3	17	6	-42	5	-13	-34	80.9524	1
v176	322	60	170	75	26	-80	-57	15	23	30	-7	24	15	-48	3	-16	-35	72.9167	1
v031	188	61	173	75	25	4	-3	26	40	54	-14	15	6	-64	-13	-8	-43	67.1875	3
v092	246	61	172	78	26	-9	-31	20	37	29	8	23	13	-51	5	-8	-48	94.1176	1
v108	261	61	159	62	25	38	9	43	47	68	-21	47	-1	-72	-11	-24	-37	51.3889	4	4
v137	286	61	160	53	21		-13	23	41	52	-11	25	10	-63	-5	-19	-39	61.9048	3
v158	305	61	170	73	25	-62	-31	-24	30	45	-15	24	-1	-53	-10	-3	-40	75.4717	3
v159	306	61	166	85	31	-7	-57	16	20	40	-20	32	25	-40	6	-10	-36	90	1
v160	307	61	170	71	25	-5	-29	18	38	45	-7	30	11	-57	-1	-14	-42	73.6842	1
v007	168	62	170	75	26	36	0	20	34	45	-11	21	14	-44	-1	-18	-27	61.3636	2
v008	169	62	170	85	29	30	-31	22	34	42	-8	30	21	-49	5	-9	-45	91.8367	1
v025	183	62	175	75	24	-56	-36	17	38	43	-5	23	12	-61	2	-24	-39	63.9344	1
v029	187	62	162	73	28	-21	-54	18	34	34	0	34	30	-54	14	-22	-46	85.1852	1
v054	210	62	163	52	20	-5	-30	20	48	57	-9	25	12	-60	8	-19	-49	81.6667	3	4
v055	211	62	172	53	18	-21	-27	30	39	54	-15	33	10	-67	-8	-17	-42	62.6866	3
v066	222	62	169	72	25	-62	-36	16	22	39	-17	22	8	-49	-6	-11	-32	65.3061	2
v078	234	62	168	65	23	9	-27	23	36	46	-10	35	11	-60	-3	-19	-38	63.3333	3
v087	242	62	170	78	27	34	6	34	43	50	-7	27	2	-60	-8	-18	-34	56.6667	3
v088	243	62	169	71	25	-9	-57	23	38	49	-11	54	18	-70	-3	-19	-48	68.5714	3
v091	245	62	167	70	25	30	-7	26	31	47	-16	34	15	-53	-4	-25	-24	45.283	3
v098	252	62	180	75	23	6	-15	29	43	53	-10	26	9	-59	2	-22	-39	66.1017	3
v106	259	62	163	70	26	10	-30	21	36	45	-9	33	19	-53	4	-15	-42	79.2453	1
v109	262	62	166	61	22	8	-8	24	43	54	-11	33	-2	-67	-16	-2	-49	73.1343	3
v110	263	62	169	59	21	17	-36	22	37	56	-19	38	18	-57	1	-11	-47	82.4561	3	4
v114	267	62	169	76	27	-23	-23	28	43	49	-6	20	13	-62	6	-24	-44	70.9677	3
v121	274	62	167	60	22	-13	-27	25	35	62	-27	47	2	-66	-11	-16	-39	59.0909	4	4
v124	277	62	163	75	28	-5	-29	23	33	38	-5	33	14	-59	-3	-18	-38	64.4068	2
v125	278	62	162	74	28	11	-19	23	41	51	-10	37	-2	-64	-7	-21	-36	56.25	3
v127	280	62	182	51	15	96	-15	26	34	44	-10	45	13	-47	2	-9	-40	85.1064	1
v145	294	62	172	73	25	-30	-8	23	36	53	-17	12	7	-52	0	-20	-32	61.5385	3
v167	313	62	162	57	22	-24	-28	28	43	50	-7	37	15	-67	1	-24	-44	65.6716	3
v168	314	62	162	54	21	0	-20	31	26	45	-19	28	14	-44	2	-11	-35	79.5455	1
v174	320	62	165	65	24	-7	-12	27	43	54	-11	26	5	-61	-3	-12	-46	75.4098	3
v006	167	63	172	69	23	-20	-9	22	38	48	-10	18	1	-53	-2	-18	-34	64.1509	3
v027	185	63	162	72	27	-21	-50	17	27	34	-7	18	16	-38	10	-5	-43	113.158	1
v034	191	63	156	61	25	31	2	25	32	53	-21	33	6	-50	-11	-14	-25	50	3
v050	207	63	174	74	24	-5	-31	20	39	47	-8	33	8	-58	-1	-13	-44	75.8621	3
v052	209	63	160	60	23	-1	-18	20	40	54	-14	18	14	-62	-10	-7	-45	72.5806	3
v061	217	63	160	53	21	-18	-29	18	37	46	-9	26	11	-61	-6	-18	-37	60.6557	3
v065	221	63	146	49	23	13	-18	25	44	52	-8	37	10	-65	-6	-15	-44	67.6923	3
v067	223	63	170	64	22	-72	-51	18	28	36	-8	33	12	-58	-2	-17	-39	67.2414	2
v070	226	63	168	64	23	-7	-57	23	35	50	-15	30	33	-55	12	-9	-58	105.455	3
v075	231	63	171	71	24	1	6	31	37	55	-18	19	-7	-52	-8	-18	-26	50	3	4
v076	232	63	168	45	16	30	1	26	38	49	-11	25	0	-47	1	-10	-38	80.8511	3
v080	236	63	167	65	23	-4	-22	26	47	60	-13	24	13	-66	-1	-14	-51	77.2727	4	4
v115	268	63	154	54	23	8	-18	24	39	48	-9	34	15	-60	-3	-20	-37	61.6667	3
v126	279	63	166	65	24	4	-38	20	25	33	-8	37	14	-47	1	-12	-36	76.5957	1
v142	291	63	167	64	23	-11	-39	23	29	36	-7	40	10	-54	-2	-14	-38	70.3704	2
v171	317	63	162	84	32	-60	-34	24	39	49	-10	26	6	-62	-1	-21	-40	64.5161	3
v172	318	63	168	71	25	6	-17	25	35	52	-17	38	16	-59	-5	-17	-37	62.7119	3
v179	325	63	170	77	27	20	-25	13	34	43	-9	21	12	-42	9	-9	-42	100	1
v021	180	64	172	70	24	46	3	38	49	44	5	29	12	-55	8	-26	-37	67.2727	1
v060	216	64	162	68	26	-22	-23	19	38	43	-5	24	8	-56	-2	-12	-42	75	2
v064	220	64	170	85	29	29	-6	26	38	51	-13	27	11	-52	1	-17	-36	69.2308	3
v081	237	64	160	59	23	-18	-32	19	29	36	-7	36	13	-55	-4	-15	-36	65.4545	2
v093	247	64	167	60	22	15	-26	29	36	39	-3	44	13	-58	-2	-15	-41	70.6897	2
v103	257	64	160	47	18	-16	-70	13	27	37	-10	41	9	-52	-5	-12	-35	67.3077	2
v119	272	64	163	90	34	18	-15	26	44	45	-1	35	12	-66	-1	-21	-44	66.6667	3
v128	281	64	167	75	27	-2	-7	31	46	62	-16	31	13	-70	-7	-24	-39	55.7143	4	4
v144	293	64	160	60	23	-70	-58	18	34	39	-5	38	14	-64	0	-15	-49	76.5625	1
v032	189	65	168	62	22	-6	-26	24	46	55	-9	22	18	-64	4	-20	-48	75	3	4
v037	194	65	165	65	24	-4	1	24	30	56	-26	27	4	-58	-19	-6	-33	56.8966	3	4
v044	201	65	172	73	25	0	-14	26	39	49	-10	24	6	-54	0	-16	-38	70.3704	3
v107	260	65	168	60	21	10	-37	24	37	63	-26	52	22	-68	-3	-23	-42	61.7647	4	4
v112	265	65	163	58	22	33	2	38	44	71	-27	43	3	-69	-12	-24	-33	47.8261	4	4
v122	275	65	170	72	25	-19	-17	22	31	48	-17	27	11	-53	-7	-18	-28	52.8302	3
v140	289	65	166	53	19	20	-15	22	40	44	-4	9	11	-47	8	-8	-47	100	1
v141	290	65	170	80	28	5	-23	29	45	48	-3	49	16	-80	-11	-17	-52	65	3
v163	310	65	168	74	26	9	-38	20	43	52	-9	28	19	-60	4	-9	-55	91.6667	3
v170	316	65	168	69	24	-32	-4	24	36	50	-14	21	-5	-53	-7	-11	-35	66.0377	3
v178	324	65				-22	-41	26	38	56	-18	30	29	-66	-1	-21	-44	66.6667	3	4
v180	326	65	160	73	29	-20	-9	19	28	40	-12	21	3	-44	-4	-13	-27	61.3636	2
v099	253	66	173	73	24	-9	-21	20	41	46	-5	17	13	-56	1	-18	-39	69.6429	3
v165	311	66	165	63	23	-38	-47	23	38	44	-6	48	14	-67	-4	-19	-44	65.6716	2
v173	319	66	163	60	23	-2	-34	28	38	55	-17	43	12	-66	-6	-14	-46	69.697	3	4
v177	323	66	165	69	25	-33	-32	20	46	48	-2	25	17	-64	5	-16	-53	82.8125	3
v048	205	67	164	66	25	-1	-28	24	35	41	-6	33	21	-59	-2	-17	-40	67.7966	2
v100	254	67	167	79	28	18	-10	28	50	65	-15	39	11	-74	-8	-22	-44	59.4595	4	4
v156	303	67	161	67	26	12	-13	24	39	65	-26	29	6	-57	-3	-15	-39	68.4211	4	4
v082	238	68	169	60	21	29	-14	25	37	45	-8	41	11	-61	-8	-18	-35	57.377	3
v129	282	68	159	68	27	2	-15	29	51	55	-4	41	8	-79	-8	-22	-49	62.0253	3	4
v028	186	71	165	72	26	-16	-30	20	34	47	-13	27	13	-54	1	-16	-39	72.2222	3
v026	184	73	165	72	26	-1	-22	17	27	41	-14	34	11	-46	-3	-13	-30	65.2174	2
v071	227	73	163	55	21	47	9	28	38	38	0	35	-2	-56	-16	-8	-32	57.1429	2
v162	309	73	171	73	25	-10	-28	23	56	66	-10	30	14	-79	-2	-23	-54	68.3544	4	4
v003	166	74	178	75	24	12	-30	21	36	54	-18	37	16	-52	2	-9	-47	90.3846	3
v154	302	74	173	74	25	22	-8	47	52	74	-22	33	16	-73	0	-20	-53	72.6027	4	4
v057	213	75	164	64	24	-27	-31	18	23	32	-9	25	-7	-41	2	-13	-30	73.1707	1
v101	255	75	156	51	21	-38	-44	21	43	56	-13	37	10	-71	2	-20	-53	74.6479	3	4
v035	192	76	173	73	24	32	-19	27	42	57	-15	41	10	-63	0	-18	-45	71.4286	3	4
v058	214	76	169	69	24	26	3	33	46	59	-13	30	-4	-64	-4	-18	-42	65.625	3
v148	297	76	170	69	24	60	-17	23	33	50	-17	46	11	-48	-1	-8	-39	81.25	3
v149	298	76	169	70	25	-9	-29	23	34	48	-14	24	17	-51	4	-13	-42	82.3529	3
v014	174	77	168	75	27	-18	-41	3	46	55	-9	38	19	-71	3	-26	-48	67.6056	3	4
v033	190	77	172	70	24	-7	-15	30	37	60	-23	32	5	-62	-6	-22	-34	54.8387	4	4
v068	224	77	173	57	19	-5	-18	28	38	49	-11	29	7	-60	-4	-14	-42	70	3
v118	271	77	169	50	18	-7	-43	16	21	35	-14	40	14	-42	4	-15	-31	73.8095	1
v130	283	77	156	58	24	-1	-31	20	43	60	-17	37	-8	-65	0	-17	-48	73.8462	4	4
v138	287	77	169	77	27	-60	-27	29	35	46	-11	32	6	-67	-7	-26	-34	50.7463	3
v150	299	77	166	58	21	-28	36	24	39	44	-5	32	16	-63	1	-17	-47	74.6032	1
v151	300	77	172	65	22	5	-39	18	29	38	-9	42	18	-50	2	-15	-37	74	1
v161	308	77	163	65	24	-10	-15	26	41	46	-5	22	16	-58	6	-24	-40	68.9655	3
v111	264	78	156	59	24	71	-6	28	40	55	-15	34	25	-55	5	-23	-37	67.2727	3	4
v094	248	79	170	68	24	46	5	36	42	62	-20	32	6	-58	-4	-17	-37	63.7931	4	4
v147	296	81	157	66	27	26	-25	21	43	56	-13	29	16	-55	6	-10	-51	92.7273	3	4
v143	292	83	169	75	26	8	-19	34	49	56	-7	37	12	-73	-4	-21	-48	65.7534	3	4
v153	301	83	167	60	22	16	32	52	47	67	-20	13	-5	-56	-1	-20	-35	62.5	4	4
										48.6267								69.6924

## Sheet: Sheet2
Roussouly PI<45, 45=<PI<60, PI=>60	ID	No.	Age	Height	Weight	BMI	C7SVA(mm)	PL_T12	PL_Lumbar	SS	PI	PT	TK	TLK	LL	LL_Upper	LL_Middle	Upper Arch	LL_Lower	LDI
1	v046	203	55	168	70	25	-36	-23	20	29	44	-15	17	7	-45	3	-15	-12	-33	73.3333
1	v049	206	57	169	60	21	37	-2	16	23	41	-18	15	8	-28	7	-12	-5	-23	82.1429
1	v077	233	57	170	59	20	18	-29	23	28	45	-17	30	15	-44	6	-12	-6	-38	86.3636
1	v134	284	58	167	63	23	-25	-38	19	33	44	-11	31	13	-55	1	-14	-13	-42	76.3636
1	v010	171	59	165	47	17	-31	-40	18	29	33	-4	29	16	-50	1	-8	-7	-43	86
1	v175	321	59	165	65	24	17	-23	20	31	45	-14	23	14	-45	4	-13	-9	-36	80
1	v038	195	60	175	73	24	12	-20	20	35	42	-7	24	10	-47	2	-11	-9	-38	80.8511
1	v072	228	60	163	73	27	-2	-10	27	36	37	-1	22	6	-47	2	-12	-10	-37	78.7234
1	v139	288	60	170	82	28	8	-22	23	26	38	-12	27	13	-43	3	-19	-16	-27	62.7907
1	v169	315	60	174	61	20	-16	-24	19	32	35	-3	17	6	-42	5	-13	-8	-34	80.9524
1	v176	322	60	170	75	26	-80	-57	15	23	30	-7	24	15	-48	3	-16	-13	-35	72.9167
1	v092	246	61	172	78	26	-9	-31	20	37	29	8	23	13	-51	5	-8	-3	-48	94.1176
1	v159	306	61	166	85	31	-7	-57	16	20	40	-20	32	25	-40	6	-10	-4	-36	90
1	v160	307	61	170	71	25	-5	-29	18	38	45	-7	30	11	-57	-1	-14	-15	-42	73.6842
1	v008	169	62	170	85	29	30	-31	22	34	42	-8	30	21	-49	5	-9	-4	-45	91.8367
1	v025	183	62	175	75	24	-56	-36	17	38	43	-5	23	12	-61	2	-24	-22	-39	63.9344
1	v029	187	62	162	73	28	-21	-54	18	34	34	0	34	30	-54	14	-22	-8	-46	85.1852
1	v106	259	62	163	70	26	10	-30	21	36	45	-9	33	19	-53	4	-15	-11	-42	79.2453
1	v127	280	62	182	51	15	96	-15	26	34	44	-10	45	13	-47	2	-9	-7	-40	85.1064
1	v168	314	62	162	54	21	0	-20	31	26	45	-19	28	14	-44	2	-11	-9	-35	79.5455
1	v027	185	63	162	72	27	-21	-50	17	27	34	-7	18	16	-38	10	-5	5	-43	113.158
1	v126	279	63	166	65	24	4	-38	20	25	33	-8	37	14	-47	1	-12	-11	-36	76.5957
1	v179	325	63	170	77	27	20	-25	13	34	43	-9	21	12	-42	9	-9	0	-42	100
1	v021	180	64	172	70	24	46	3	38	49	44	5	29	12	-55	8	-26	-18	-37	67.2727
1	v144	293	64	160	60	23	-70	-58	18	34	39	-5	38	14	-64	0	-15	-15	-49	76.5625
1	v140	289	65	166	53	19	20	-15	22	40	44	-4	9	11	-47	8	-8	0	-47	100
1	v057	213	75	164	64	24	-27	-31	18	23	32	-9	25	-7	-41	2	-13	-11	-30	73.1707
1	v118	271	77	169	50	18	-7	-43	16	21	35	-14	40	14	-42	4	-15	-11	-31	73.8095
1	v150	299	77	166	58	21	-28	36	24	39	44	-5	32	16	-63	1	-17	-16	-47	74.6032
1	v151	300	77	172	65	22	5	-39	18	29	38	-9	42	18	-50	2	-15	-13	-37	74
30명			62.9333	168.167	66.8	23.6333	-3.93333	-28.3667	20.4333	31.4333	39.5667	-8.13333	27.6	13.3667	-47.9667	4.03333	-13.4	-9.36667	-38.6	81.0755
2	v045	202	56	167	70	25	-31	-12	20	35	43	-8	14	-5	-48	-1	-12	-13	-35	72.9167
2	v063	219	57	168	63	22	-72	-34	22	35	42	-7	21	6	-55	-1	-19	-20	-35	63.6364
2	v097	251	58	178	86	27	-4	-22	23	32	44	-12	33	4	-51	-4	-11	-15	-36	70.5882
2	v123	276	58	178	85	27	14	-6	23	33	36	-3	30	7	-53	-5	-19	-24	-29	54.717
2	v009	170	59	161	67	26	-10	-32	20	33	41	-8	37	13	-57	0	-25	-25	-32	56.1404
2	v015	175	59	173	68	23	-33	-16	25	36	44	-8	26	6	-58	-1	-17	-18	-40	68.9655
2	v059	215	59	170	89	31	22	-20	20	37	44	-7	35	15	-56	-1	-19	-20	-36	64.2857
2	v012	172	60	170	74	26	-32	-24	29	30	43	-13	23	10	-54	-3	-21	-24	-30	55.5556
2	v024	182	60	162	61	23	-11	-30	16	26	40	-14	26	13	-45	0	-13	-13	-32	71.1111
2	v007	168	62	170	75	26	36	0	20	34	45	-11	21	14	-44	-1	-18	-19	-27	61.3636
2	v066	222	62	169	72	25	-62	-36	16	22	39	-17	22	8	-49	-6	-11	-17	-32	65.3061
2	v124	277	62	163	75	28	-5	-29	23	33	38	-5	33	14	-59	-3	-18	-21	-38	64.4068
2	v067	223	63	170	64	22	-72	-51	18	28	36	-8	33	12	-58	-2	-17	-19	-39	67.2414
2	v142	291	63	167	64	23	-11	-39	23	29	36	-7	40	10	-54	-2	-14	-16	-38	70.3704
2	v060	216	64	162	68	26	-22	-23	19	38	43	-5	24	8	-56	-2	-12	-14	-42	75
2	v081	237	64	160	59	23	-18	-32	19	29	36	-7	36	13	-55	-4	-15	-19	-36	65.4545
2	v093	247	64	167	60	22	15	-26	29	36	39	-3	44	13	-58	-2	-15	-17	-41	70.6897
2	v103	257	64	160	47	18	-16	-70	13	27	37	-10	41	9	-52	-5	-12	-17	-35	67.3077
2	v180	326	65	160	73	29	-20	-9	19	28	40	-12	21	3	-44	-4	-13	-17	-27	61.3636
2	v165	311	66	165	63	23	-38	-47	23	38	44	-6	48	14	-67	-4	-19	-23	-44	65.6716
2	v048	205	67	164	66	25	-1	-28	24	35	41	-6	33	21	-59	-2	-17	-19	-40	67.7966
2	v026	184	73	165	72	26	-1	-22	17	27	41	-14	34	11	-46	-3	-13	-16	-30	65.2174
2	v071	227	73	163	55	21	47	9	28	38	38	0	35	-2	-56	-16	-8	-24	-32	57.1429
23명			62.5217	166.609	68.5217	24.6522	-14.1304	-26.0435	21.2609	32.1304	40.4348	-8.30435	30.8696	9.43478	-53.6522	-3.13043	-15.5652	-18.6957	-35.0435	65.3152
3	v036	193	53	168	67	24	8	-20	25	34	58	-24	39	6	-55	-4	-16	-20	-35	63.6364
3	v113	266	55	164	53	20	9	-7	26	41	55	-14	36	-2	-63	-10	-13	-23	-40	63.4921
3	v073	229	56	170	70	24	-5	-33	22	37	46	-9	43	12	-64	-15	-7	-22	-42	65.625
3	v117	270	56	171	85	29	11	-19	23	38	52	-14	21	11	-51	3	-13	-10	-41	80.3922
3	p012	10	57	171	75	26	-11	-32	24	43	49	-6	36	6	-62	0	-18	-18	-44	70.9677
3	v013	173	57	158	65	26	9	-5	31	31	56	-25	20	8	-47	-1	-13	-14	-33	70.2128
3	v017	177	57	173	75	25	-22	-6	32	46	52	-6	19	7	-65	-6	-23	-29	-36	55.3846
3	v047	204	57	178	88	28	-11	-4	32	45	53	-8	8	2	-62	-5	-17	-22	-40	64.5161
3	v056	212	57	163	58	22	-19	6	36	37	47	-10	33	-5	-61	-13	-24	-37	-24	39.3443
3	v135	285	57	171	76	26	-1	-2	28	38	52	-14	18	2	-54	-3	-5	-8	-46	85.1852
3	v089	244	58	172	68	23	5	-28	28	40	56	-16	30	19	-60	3	-20	-17	-43	71.6667
3	v116	269	58	161	53	20	58	-1	31	44	46	-2	30	11	-58	0	-18	-18	-40	68.9655
3	v039	196	59	162	62	24	-16	-4	27	43	50	-7	28	6	-64	-9	-16	-25	-39	60.9375
3	v062	218	59	165	50	18	17	-20	23	37	49	-12	23	16	-54	2	-16	-14	-40	74.0741
3	v074	230	59	167	71	25	31	-16	29	42	56	-14	40	12	-66	-6	-22	-28	-38	57.5758
3	v079	235	59	159	36	14	24	-13	23	40	49	-9	25	11	-53	4	-15	-11	-42	79.2453
3	v086	241	59	167	63	23	-9	-1	35	41	53	-12	28	0	-62	-7	-22	-29	-33	53.2258
3	v023	181	60	172	70	24	10	-5	30	30	51	-21	35	5	-63	-18	-9	-27	-36	57.1429
3	v040	197	60	161	63	24	-25	-19	24	43	50	-7	35	7	-70	-2	-26	-28	-42	60
3	v041	198	60	164	78	29	-9	-17	28	40	57	-17	23	7	-60	-2	-15	-17	-43	71.6667
3	v051	208	60	166	72	26	-44	-29	19	35	46	-11	24	3	-59	-3	-16	-19	-40	67.7966
3	v069	225	60	175	75	24	-21	-44	23	40	50	-10	25	23	-59	9	-18	-9	-50	84.7458
3	v102	256	60	167	65	23	-22	-17	26	41	48	-7	43	-2	-79	-24	-16	-40	-39	49.3671
3	v031	188	61	173	75	25	4	-3	26	40	54	-14	15	6	-64	-13	-8	-21	-43	67.1875
3	v137	286	61	160	53	21		-13	23	41	52	-11	25	10	-63	-5	-19	-24	-39	61.9048
3	v158	305	61	170	73	25	-62	-31	-24	30	45	-15	24	-1	-53	-10	-3	-13	-40	75.4717
3	v054	210	62	163	52	20	-5	-30	20	48	57	-9	25	12	-60	8	-19	-11	-49	81.6667
3	v055	211	62	172	53	18	-21	-27	30	39	54	-15	33	10	-67	-8	-17	-25	-42	62.6866
3	v078	234	62	168	65	23	9	-27	23	36	46	-10	35	11	-60	-3	-19	-22	-38	63.3333
3	v087	242	62	170	78	27	34	6	34	43	50	-7	27	2	-60	-8	-18	-26	-34	56.6667
3	v088	243	62	169	71	25	-9	-57	23	38	49	-11	54	18	-70	-3	-19	-22	-48	68.5714
3	v091	245	62	167	70	25	30	-7	26	31	47	-16	34	15	-53	-4	-25	-29	-24	45.283
3	v098	252	62	180	75	23	6	-15	29	43	53	-10	26	9	-59	2	-22	-20	-39	66.1017
3	v109	262	62	166	61	22	8	-8	24	43	54	-11	33	-2	-67	-16	-2	-18	-49	73.1343
3	v110	263	62	169	59	21	17	-36	22	37	56	-19	38	18	-57	1	-11	-10	-47	82.4561
3	v114	267	62	169	76	27	-23	-23	28	43	49	-6	20	13	-62	6	-24	-18	-44	70.9677
3	v125	278	62	162	74	28	11	-19	23	41	51	-10	37	-2	-64	-7	-21	-28	-36	56.25
3	v145	294	62	172	73	25	-30	-8	23	36	53	-17	12	7	-52	0	-20	-20	-32	61.5385
3	v167	313	62	162	57	22	-24	-28	28	43	50	-7	37	15	-67	1	-24	-23	-44	65.6716
3	v174	320	62	165	65	24	-7	-12	27	43	54	-11	26	5	-61	-3	-12	-15	-46	75.4098
3	v006	167	63	172	69	23	-20	-9	22	38	48	-10	18	1	-53	-2	-18	-20	-34	64.1509
3	v034	191	63	156	61	25	31	2	25	32	53	-21	33	6	-50	-11	-14	-25	-25	50
3	v050	207	63	174	74	24	-5	-31	20	39	47	-8	33	8	-58	-1	-13	-14	-44	75.8621
3	v052	209	63	160	60	23	-1	-18	20	40	54	-14	18	14	-62	-10	-7	-17	-45	72.5806
3	v061	217	63	160	53	21	-18	-29	18	37	46	-9	26	11	-61	-6	-18	-24	-37	60.6557
3	v065	221	63	146	49	23	13	-18	25	44	52	-8	37	10	-65	-6	-15	-21	-44	67.6923
3	v070	226	63	168	64	23	-7	-57	23	35	50	-15	30	33	-55	12	-9	3	-58	105.455
3	v075	231	63	171	71	24	1	6	31	37	55	-18	19	-7	-52	-8	-18	-26	-26	50
3	v076	232	63	168	45	16	30	1	26	38	49	-11	25	0	-47	1	-10	-9	-38	80.8511
3	v115	268	63	154	54	23	8	-18	24	39	48	-9	34	15	-60	-3	-20	-23	-37	61.6667
3	v171	317	63	162	84	32	-60	-34	24	39	49	-10	26	6	-62	-1	-21	-22	-40	64.5161
3	v172	318	63	168	71	25	6	-17	25	35	52	-17	38	16	-59	-5	-17	-22	-37	62.7119
3	v064	220	64	170	85	29	29	-6	26	38	51	-13	27	11	-52	1	-17	-16	-36	69.2308
3	v119	272	64	163	90	34	18	-15	26	44	45	-1	35	12	-66	-1	-21	-22	-44	66.6667
3	v032	189	65	168	62	22	-6	-26	24	46	55	-9	22	18	-64	4	-20	-16	-48	75
3	v037	194	65	165	65	24	-4	1	24	30	56	-26	27	4	-58	-19	-6	-25	-33	56.8966
3	v044	201	65	172	73	25	0	-14	26	39	49	-10	24	6	-54	0	-16	-16	-38	70.3704
3	v122	275	65	170	72	25	-19	-17	22	31	48	-17	27	11	-53	-7	-18	-25	-28	52.8302
3	v141	290	65	170	80	28	5	-23	29	45	48	-3	49	16	-80	-11	-17	-28	-52	65
3	v163	310	65	168	74	26	9	-38	20	43	52	-9	28	19	-60	4	-9	-5	-55	91.6667
3	v170	316	65	168	69	24	-32	-4	24	36	50	-14	21	-5	-53	-7	-11	-18	-35	66.0377
3	v178	324	65				-22	-41	26	38	56	-18	30	29	-66	-1	-21	-22	-44	66.6667
3	v099	253	66	173	73	24	-9	-21	20	41	46	-5	17	13	-56	1	-18	-17	-39	69.6429
3	v173	319	66	163	60	23	-2	-34	28	38	55	-17	43	12	-66	-6	-14	-20	-46	69.697
3	v177	323	66	165	69	25	-33	-32	20	46	48	-2	25	17	-64	5	-16	-11	-53	82.8125
3	v082	238	68	169	60	21	29	-14	25	37	45	-8	41	11	-61	-8	-18	-26	-35	57.377
3	v129	282	68	159	68	27	2	-15	29	51	55	-4	41	8	-79	-8	-22	-30	-49	62.0253
3	v028	186	71	165	72	26	-16	-30	20	34	47	-13	27	13	-54	1	-16	-15	-39	72.2222
3	v003	166	74	178	75	24	12	-30	21	36	54	-18	37	16	-52	2	-9	-7	-47	90.3846
3	v101	255	75	156	51	21	-38	-44	21	43	56	-13	37	10	-71	2	-20	-18	-53	74.6479
3	v035	192	76	173	73	24	32	-19	27	42	57	-15	41	10	-63	0	-18	-18	-45	71.4286
3	v058	214	76	169	69	24	26	3	33	46	59	-13	30	-4	-64	-4	-18	-22	-42	65.625
3	v148	297	76	170	69	24	60	-17	23	33	50	-17	46	11	-48	-1	-8	-9	-39	81.25
3	v149	298	76	169	70	25	-9	-29	23	34	48	-14	24	17	-51	4	-13	-9	-42	82.3529
3	v014	174	77	168	75	27	-18	-41	3	46	55	-9	38	19	-71	3	-26	-23	-48	67.6056
3	v068	224	77	173	57	19	-5	-18	28	38	49	-11	29	7	-60	-4	-14	-18	-42	70
3	v138	287	77	169	77	27	-60	-27	29	35	46	-11	32	6	-67	-7	-26	-33	-34	50.7463
3	v161	308	77	163	65	24	-10	-15	26	41	46	-5	22	16	-58	6	-24	-18	-40	68.9655
3	v111	264	78	156	59	24	71	-6	28	40	55	-15	34	25	-55	5	-23	-18	-37	67.2727
3	v147	296	81	157	66	27	26	-25	21	43	56	-13	29	16	-55	6	-10	-4	-51	92.7273
3	v143	292	83	169	75	26	8	-19	34	49	56	-7	37	12	-73	-4	-21	-25	-48	65.7534
3	v146	295	60	165	78	29	-23	-7	29	51	48	3	20	7	-67	1	-20	-19	-48	71.6418
82명			64.0976	166.716	67.3333	24.1728	-1.18519	-18.5244	24.7317	39.6098	51.2073	-11.5976	29.7561	9.59756	-60.4268	-3.07317	-16.4756	-19.5488	-40.9146	68.0507
4	v166	312	59	172	52	18	29	0	39	51	73	-22	33	6	-69	-6	-20	-26	-43	62.3188
4	v108	261	61	159	62	25	38	9	43	47	68	-21	47	-1	-72	-11	-24	-35	-37	51.3889
4	v121	274	62	167	60	22	-13	-27	25	35	62	-27	47	2	-66	-11	-16	-27	-39	59.0909
4	v080	236	63	167	65	23	-4	-22	26	47	60	-13	24	13	-66	-1	-14	-15	-51	77.2727
4	v128	281	64	167	75	27	-2	-7	31	46	62	-16	31	13	-70	-7	-24	-31	-39	55.7143
4	v107	260	65	168	60	21	10	-37	24	37	63	-26	52	22	-68	-3	-23	-26	-42	61.7647
4	v112	265	65	163	58	22	33	2	38	44	71	-27	43	3	-69	-12	-24	-36	-33	47.8261
4	v100	254	67	167	79	28	18	-10	28	50	65	-15	39	11	-74	-8	-22	-30	-44	59.4595
4	v156	303	67	161	67	26	12	-13	24	39	65	-26	29	6	-57	-3	-15	-18	-39	68.4211
4	v162	309	73	171	73	25	-10	-28	23	56	66	-10	30	14	-79	-2	-23	-25	-54	68.3544
4	v154	302	74	173	74	25	22	-8	47	52	74	-22	33	16	-73	0	-20	-20	-53	72.6027
4	v033	190	77	172	70	24	-7	-15	30	37	60	-23	32	5	-62	-6	-22	-28	-34	54.8387
4	v130	283	77	156	58	24	-1	-31	20	43	60	-17	37	-8	-65	0	-17	-17	-48	73.8462
4	v094	248	79	170	68	24	46	5	36	42	62	-20	32	6	-58	-4	-17	-21	-37	63.7931
4	v153	301	83	167	60	22	16	32	52	47	67	-20	13	-5	-56	-1	-20	-21	-35	62.5
15명			69.0667	166.667	65.4	23.7333	12.4667	-10	32.4	44.8667	65.2	-20.3333	34.8	6.86667	-66.9333	-5	-20.0667	-25.0667	-41.8667	62.6128
